# Supplementary material for: Taxonomic and Functional Metagenomics Profiling of Tuwa and Unnai Hot Springs Microbial Communities
Source: Research Square preprint supplement (doi:10.21203/rs.3.rs-1002337/v1), 2021-11-10
Supplement: Supplementary file 1 [file 5bac9c019d127daee347e105.xlsx]

## Sheet: Phylum
Supplementary file 1: Phyla, Class and Genus are represented as others (abundance <1%)
Phyla represented as others
Level2	ES1	ES2	EW1	EW2	Tuwa_S1	Tuwa_S2	Unai_S1	Unai_S2			Level2 (Average)	ES	EW	Tuwa_S	Unnai_S
Candidatus Berkelbacteria	31	51	31	24	0	1	2	1			Candidatus Berkelbacteria	41	27.5	0.5	1.5
FCPU426	1	0	0	1	1	0	0	5			FCPU426	0.5	0.5	0.5	2.5
Lentisphaerae	0	6	6	12	1	0	1	0			Lentisphaerae	3	9	0.5	0.5
Gemmatimonadetes	0	1	1	2	1	3	24	33			Gemmatimonadetes	0.5	1.5	2	28.5
Microgenomates	0	1	0	1	22	6	28	37			Microgenomates	0.5	0.5	14	32.5
Fibrobacteres	0	0	1	0	3	3	0	1			Fibrobacteres	0	0.5	3	0.5
Saccharibacteria	0	0	1	0	0	2	0	1			Saccharibacteria	0	0.5	1	0.5
Marinimicrobia (SAR406 clade)	0	0	0	1	0	0	0	1			Marinimicrobia (SAR406 clade)	0	0.5	0	0.5
Aquificae	0	0	0	0	72	113	51	75			Aquificae	0	0	92.5	63
AC1	0	0	0	0	47	11	22	12			AC1	0	0	29	17
Ambiguous_taxa	0	0	0	0	34	32	0	5			Ambiguous_taxa	0	0	33	2.5
Spirochaetae	0	0	0	0	32	47	15	40			Spirochaetae	0	0	39.5	27.5
Crenarchaeota	0	0	0	0	30	9	0	1			Crenarchaeota	0	0	19.5	0.5
GAL15	0	0	0	0	29	15	0	0			GAL15	0	0	22	0
BP4	0	0	0	0	28	23	1	2			BP4	0	0	25.5	1.5
Verrucomicrobia	0	0	0	0	26	27	52	50			Verrucomicrobia	0	0	26.5	51
WS2	0	0	0	0	26	20	9	36			WS2	0	0	23	22.5
Acetothermia	0	0	0	0	24	20	1	10			Acetothermia	0	0	22	5.5
Aminicenantes	0	0	0	0	21	4	1	0			Aminicenantes	0	0	12.5	0.5
Candidate division YNPFFA	0	0	0	0	16	0	0	0			Candidate division YNPFFA	0	0	8	0
BRC1	0	0	0	0	11	12	6	6			BRC1	0	0	11.5	6
Synergistetes	0	0	0	0	11	11	16	10			Synergistetes	0	0	11	13
WSA2	0	0	0	0	6	0	0	0			WSA2	0	0	3	0
Euryarchaeota	0	0	0	0	5	3	3	0			Euryarchaeota	0	0	4	1.5
WWE3	0	0	0	0	5	1	0	28			WWE3	0	0	3	14
SR1 (Absconditabacteria)	0	0	0	0	4	7	0	0			SR1 (Absconditabacteria)	0	0	5.5	0
Nitrospinae	0	0	0	0	4	5	4	2			Nitrospinae	0	0	4.5	3
RBG-1 (Zixibacteria)	0	0	0	0	4	5	0	0			RBG-1 (Zixibacteria)	0	0	4.5	0
FBP	0	0	0	0	3	4	1	1			FBP	0	0	3.5	1
Woesearchaeota (DHVEG-6)	0	0	0	0	2	5	2	6			Woesearchaeota (DHVEG-6)	0	0	3.5	4
Thermodesulfobacteria	0	0	0	0	2	1	0	1			Thermodesulfobacteria	0	0	1.5	0.5
Elusimicrobia	0	0	0	0	2	1	0	0			Elusimicrobia	0	0	1.5	0
WS1	0	0	0	0	1	4	0	2			WS1	0	0	2.5	1
Fervidibacteria	0	0	0	0	1	1	0	0			Fervidibacteria	0	0	1	0
Lokiarchaeota	0	0	0	0	1	1	0	0			Lokiarchaeota	0	0	1	0
pMC2A209	0	0	0	0	1	0	0	0			pMC2A209	0	0	0.5	0
Hydrogenedentes	0	0	0	0	0	5	3	0			Hydrogenedentes	0	0	2.5	1.5
SBR1093	0	0	0	0	0	2	6	4			SBR1093	0	0	1	5
Latescibacteria	0	0	0	0	0	2	1	2			Latescibacteria	0	0	1	1.5
Tenericutes	0	0	0	0	0	2	0	1			Tenericutes	0	0	1	0.5
TA06	0	0	0	0	0	1	0	0			TA06	0	0	0.5	0
WS6	0	0	0	0	0	1	0	0			WS6	0	0	0.5	0
Marine Benthic Group E	0	0	0	0	0	0	1	1			Marine Benthic Group E	0	0	0	1
Omnitrophica	0	0	0	0	0	0	1	0			Omnitrophica	0	0	0	0.5
Chlamydiae	0	0	0	0	0	0	0	6			Chlamydiae	0	0	0	3
Aerophobetes	0	0	0	0	0	0	0	2			Aerophobetes	0	0	0	1
PAUC34f	0	0	0	0	0	0	0	1			PAUC34f	0	0	0	0.5

## Sheet: Class
Class represented as others
Level3	ES1	ES2	EW1	EW2	Tuwa_S1	Tuwa_S2	Unai_S1	Unai_S2		Level3 (Average)	ES	EW	Tuwa_S	Unnai_S
terrestrial metagenome	48	93	31	27	24	26	29	55		terrestrial metagenome	70.5	29	25	42
Berkelbacteria bacterium GW2011_GWA2_38_9	31	51	31	24	0	0	0	0		Berkelbacteria bacterium GW2011_GWA2_38_9	41	27.5	0	0
Phycisphaerae	13	8	7	9	3	6	3	9		Phycisphaerae	10.5	8	4.5	6
Blastocatellia	6	5	17	22	45	29	6	7		Blastocatellia	5.5	19.5	37	6.5
Subgroup 6	5	7	6	10	7	4	3	11		Subgroup 6	6	8	5.5	7
Chloroflexia	5	2	16	23	2	4	0	5		Chloroflexia	3.5	19.5	3	2.5
uncultured archaeon	1	0	0	0	37	23	4	4		uncultured archaeon	0.5	0	30	4
S085	1	0	0	0	6	3	8	7		S085	0.5	0	4.5	7.5
Acidimicrobiia	1	0	0	0	5	4	4	9		Acidimicrobiia	0.5	0	4.5	6.5
Lentisphaeria	0	6	6	11	1	0	1	0		Lentisphaeria	3	8.5	0.5	0.5
Bacteroidia	0	2	0	1	24	23	3	13		Bacteroidia	1	0.5	23.5	8
SAR202 clade	0	2	0	0	6	4	11	15		SAR202 clade	1	0	5	13
Longimicrobia	0	1	1	2	0	2	0	0		Longimicrobia	0.5	1.5	1	0
Candidatus Collierbacteria	0	1	0	1	0	0	0	0		Candidatus Collierbacteria	0.5	0.5	0	0
Fimbriimonadia	0	0	1	1	0	2	2	1		Fimbriimonadia	0	1	1	1.5
Fibrobacteria	0	0	1	0	2	2	0	1		Fibrobacteria	0	0.5	2	0.5
Elev-1554	0	0	1	0	0	0	0	0		Elev-1554	0	0.5	0	0
Oligosphaeria	0	0	0	1	0	0	0	0		Oligosphaeria	0	0.5	0	0
Caldisericia	0	0	0	0	93	53	6	7		Caldisericia	0	0	73	6.5
Aquificae	0	0	0	0	72	113	51	75		Aquificae	0	0	92.5	63
Thermoflexia	0	0	0	0	47	17	0	0		Thermoflexia	0	0	32	0
Spirochaetes	0	0	0	0	32	47	15	40		Spirochaetes	0	0	39.5	27.5
uncultured	0	0	0	0	32	25	57	88		uncultured	0	0	28.5	72.5
Cytophagia	0	0	0	0	30	29	4	8		Cytophagia	0	0	29.5	6
Epsilonproteobacteria	0	0	0	0	30	17	10	9		Epsilonproteobacteria	0	0	23.5	9.5
Thermoprotei	0	0	0	0	30	9	0	1		Thermoprotei	0	0	19.5	0.5
Candidatus Roizmanbacteria	0	0	0	0	21	3	4	1		Candidatus Roizmanbacteria	0	0	12	2.5
Unknown Class	0	0	0	0	20	16	4	9		Unknown Class	0	0	18	6.5
Opitutae	0	0	0	0	15	12	0	0		Opitutae	0	0	13.5	0
Planctomycetacia	0	0	0	0	13	7	13	29		Planctomycetacia	0	0	10	21
Sphingobacteriia	0	0	0	0	12	15	3	10		Sphingobacteriia	0	0	13.5	6.5
Synergistia	0	0	0	0	11	11	16	10		Synergistia	0	0	11	13
OPB41	0	0	0	0	10	11	0	0		OPB41	0	0	10.5	0
uncultured organism	0	0	0	0	9	6	2	1		uncultured organism	0	0	7.5	1.5
Holophagae	0	0	0	0	9	4	101	60		Holophagae	0	0	6.5	80.5
Atribacteria Incertae Sedis	0	0	0	0	9	2	9	7		Atribacteria Incertae Sedis	0	0	5.5	8
Subgroup 22	0	0	0	0	8	3	0	5		Subgroup 22	0	0	5.5	2.5
miscellaneous Crenarchaeota group archaeon SMTZ1-55	0	0	0	0	8	2	0	0		miscellaneous Crenarchaeota group archaeon SMTZ1-55	0	0	5	0
uncultured crenarchaeote	0	0	0	0	8	1	0	0		uncultured crenarchaeote	0	0	4.5	0
Chthonomonadetes	0	0	0	0	6	16	17	36		Chthonomonadetes	0	0	11	26.5
WCHA1-57	0	0	0	0	6	0	0	0		WCHA1-57	0	0	3	0
SB-5	0	0	0	0	5	10	1	0		SB-5	0	0	7.5	0.5
MSB-5E12	0	0	0	0	5	1	0	0		MSB-5E12	0	0	3	0
vadinHA49	0	0	0	0	4	2	0	4		vadinHA49	0	0	3	2
Thermoleophilia	0	0	0	0	4	1	9	13		Thermoleophilia	0	0	2.5	11
Thermomicrobia	0	0	0	0	3	7	4	5		Thermomicrobia	0	0	5	4.5
OPB35 soil group	0	0	0	0	3	5	50	44		OPB35 soil group	0	0	4	47
Thermoplasmata	0	0	0	0	3	2	2	0		Thermoplasmata	0	0	2.5	1
MD2896-B214	0	0	0	0	3	2	1	2		MD2896-B214	0	0	2.5	1.5
Candidatus Wolfebacteria	0	0	0	0	3	0	91	56		Candidatus Wolfebacteria	0	0	1.5	73.5
WCHB1-32	0	0	0	0	3	0	0	1		WCHB1-32	0	0	1.5	0.5
WCHB1-41	0	0	0	0	2	4	1	1		WCHB1-41	0	0	3	1
uncultured candidate division GN04 bacterium	0	0	0	0	2	4	0	0		uncultured candidate division GN04 bacterium	0	0	3	0
MB-A2-108	0	0	0	0	2	2	2	0		MB-A2-108	0	0	2	1
Spartobacteria	0	0	0	0	2	2	0	0		Spartobacteria	0	0	2	0
Subgroup 2	0	0	0	0	2	1	7	5		Subgroup 2	0	0	1.5	6
TK10	0	0	0	0	2	1	4	9		TK10	0	0	1.5	6.5
Subgroup 18	0	0	0	0	2	1	0	3		Subgroup 18	0	0	1.5	1.5
Thermodesulfobacteria	0	0	0	0	2	1	0	1		Thermodesulfobacteria	0	0	1.5	0.5
bioreactor metagenome	0	0	0	0	2	1	0	0		bioreactor metagenome	0	0	1.5	0
Elusimicrobia	0	0	0	0	2	1	0	0		Elusimicrobia	0	0	1.5	0
SJA-68	0	0	0	0	2	0	1	4		SJA-68	0	0	1	2.5
Methanomicrobia	0	0	0	0	2	0	0	0		Methanomicrobia	0	0	1	0
TakashiAC-B11	0	0	0	0	2	0	0	0		TakashiAC-B11	0	0	1	0
Caldilineae	0	0	0	0	1	7	8	7		Caldilineae	0	0	4	7.5
Candidatus Pacebacteria	0	0	0	0	1	2	3	5		Candidatus Pacebacteria	0	0	1.5	4
Erysipelotrichia	0	0	0	0	1	2	0	1		Erysipelotrichia	0	0	1.5	0.5
Nitrospinia	0	0	0	0	1	2	0	0		Nitrospinia	0	0	1.5	0
Chloroflexi Incertae Sedis	0	0	0	0	1	1	1	2		Chloroflexi Incertae Sedis	0	0	1	1.5
Ardenticatenia	0	0	0	0	1	1	1	1		Ardenticatenia	0	0	1	1
Chitinivibrionia	0	0	0	0	1	1	0	0		Chitinivibrionia	0	0	1	0
Deferribacteres	0	0	0	0	1	1	0	0		Deferribacteres	0	0	1	0
Nitriliruptoria	0	0	0	0	1	1	0	0		Nitriliruptoria	0	0	1	0
uncultured delta proteobacterium	0	0	0	0	1	1	0	0		uncultured delta proteobacterium	0	0	1	0
Gemmatimonadetes	0	0	0	0	1	0	22	32		Gemmatimonadetes	0	0	0.5	27
Candidatus Jorgensenbacteria	0	0	0	0	1	0	18	5		Candidatus Jorgensenbacteria	0	0	0.5	11.5
Candidatus Magasanikbacteria	0	0	0	0	1	0	8	4		Candidatus Magasanikbacteria	0	0	0.5	6
Bacteroidetes VC2.1 Bac22	0	0	0	0	1	0	4	9		Bacteroidetes VC2.1 Bac22	0	0	0.5	6.5
uncultured euryarchaeote	0	0	0	0	1	0	2	5		uncultured euryarchaeote	0	0	0.5	3.5
uncultured microorganism	0	0	0	0	1	0	0	1		uncultured microorganism	0	0	0.5	0.5
Candidatus Azambacteria	0	0	0	0	1	0	0	0		Candidatus Azambacteria	0	0	0.5	0
Limnochordia	0	0	0	0	1	0	0	0		Limnochordia	0	0	0.5	0
MBMPE71	0	0	0	0	1	0	0	0		MBMPE71	0	0	0.5	0
uncultured Microgenomates group bacterium	0	0	0	0	1	0	0	0		uncultured Microgenomates group bacterium	0	0	0.5	0
SBR2076	0	0	0	0	0	19	5	4		SBR2076	0	0	9.5	4.5
SHA-26	0	0	0	0	0	3	1	8		SHA-26	0	0	1.5	4.5
Latescibacteria Incertae Sedis	0	0	0	0	0	2	0	1		Latescibacteria Incertae Sedis	0	0	1	0.5
Mollicutes	0	0	0	0	0	2	0	1		Mollicutes	0	0	1	0.5
ARKDMS-49	0	0	0	0	0	2	0	0		ARKDMS-49	0	0	1	0
JG30-KF-CM66	0	0	0	0	0	2	0	0		JG30-KF-CM66	0	0	1	0
ML602M-17	0	0	0	0	0	2	0	0		ML602M-17	0	0	1	0
uncultured bacterium UASB_TL56	0	0	0	0	0	2	0	0		uncultured bacterium UASB_TL56	0	0	1	0
Verrucomicrobiae	0	0	0	0	0	2	0	0		Verrucomicrobiae	0	0	1	0
Candidatus Woesebacteria	0	0	0	0	0	1	16	28		Candidatus Woesebacteria	0	0	0.5	22
Coriobacteriia	0	0	0	0	0	1	8	4		Coriobacteriia	0	0	0.5	6
MD2898-B26	0	0	0	0	0	1	3	0		MD2898-B26	0	0	0.5	1.5
BD7-11	0	0	0	0	0	1	1	0		BD7-11	0	0	0.5	0.5
Methanobacteria	0	0	0	0	0	1	1	0		Methanobacteria	0	0	0.5	0.5
AKAU4049	0	0	0	0	0	1	0	0		AKAU4049	0	0	0.5	0
Berkelbacteria bacterium GW2011_GWA2_35_9	0	0	0	0	0	1	0	0		Berkelbacteria bacterium GW2011_GWA2_35_9	0	0	0.5	0
Ika33	0	0	0	0	0	1	0	0		Ika33	0	0	0.5	0
microbial mat metagenome	0	0	0	0	0	1	0	0		microbial mat metagenome	0	0	0.5	0
Nanoarchaeota archaeon SCGC AAA011-D5	0	0	0	0	0	1	0	0		Nanoarchaeota archaeon SCGC AAA011-D5	0	0	0.5	0
uncultured candidate division WS6 bacterium	0	0	0	0	0	1	0	0		uncultured candidate division WS6 bacterium	0	0	0.5	0
SJA-15	0	0	0	0	0	0	14	3		SJA-15	0	0	0	8.5
Acidobacteria	0	0	0	0	0	0	13	0		Acidobacteria	0	0	0	6.5
Dehalococcoidia	0	0	0	0	0	0	11	10		Dehalococcoidia	0	0	0	10.5
KD4-96	0	0	0	0	0	0	3	5		KD4-96	0	0	0	4
Candidatus Giovannonibacteria	0	0	0	0	0	0	3	2		Candidatus Giovannonibacteria	0	0	0	2.5
Candidatus Amesbacteria	0	0	0	0	0	0	3	1		Candidatus Amesbacteria	0	0	0	2
uncultured deep-sea bacterium	0	0	0	0	0	0	2	2		uncultured deep-sea bacterium	0	0	0	2
FFCH5909	0	0	0	0	0	0	2	1		FFCH5909	0	0	0	1.5
Parcubacteria bacterium DG_74_3	0	0	0	0	0	0	2	1		Parcubacteria bacterium DG_74_3	0	0	0	1.5
Candidatus Jorgensenbacteria bacterium GW2011_GWF2_41_8	0	0	0	0	0	0	2	0		Candidatus Jorgensenbacteria bacterium GW2011_GWF2_41_8	0	0	0	1
Parcubacteria bacterium SCGC AAA010-E09	0	0	0	0	0	0	2	0		Parcubacteria bacterium SCGC AAA010-E09	0	0	0	1
Rubrobacteria	0	0	0	0	0	0	2	0		Rubrobacteria	0	0	0	1
Verrucomicrobia Incertae Sedis	0	0	0	0	0	0	1	4		Verrucomicrobia Incertae Sedis	0	0	0	2.5
Subgroup 17	0	0	0	0	0	0	1	1		Subgroup 17	0	0	0	1
Armatimonadia	0	0	0	0	0	0	1	0		Armatimonadia	0	0	0	0.5
Bacteroidetes BD2-2	0	0	0	0	0	0	1	0		Bacteroidetes BD2-2	0	0	0	0.5
BD2-11 terrestrial group	0	0	0	0	0	0	1	0		BD2-11 terrestrial group	0	0	0	0.5
Candidatus Daviesbacteria	0	0	0	0	0	0	1	0		Candidatus Daviesbacteria	0	0	0	0.5
MD2896-B258	0	0	0	0	0	0	1	0		MD2896-B258	0	0	0	0.5
MD2902-B12	0	0	0	0	0	0	1	0		MD2902-B12	0	0	0	0.5
Pla4 lineage	0	0	0	0	0	0	1	0		Pla4 lineage	0	0	0	0.5
Subgroup 25	0	0	0	0	0	0	1	0		Subgroup 25	0	0	0	0.5
Subgroup 26	0	0	0	0	0	0	1	0		Subgroup 26	0	0	0	0.5
Subgroup 21	0	0	0	0	0	0	0	8		Subgroup 21	0	0	0	4
Chlamydiae	0	0	0	0	0	0	0	6		Chlamydiae	0	0	0	3
Proteobacteria Incertae Sedis	0	0	0	0	0	0	0	4		Proteobacteria Incertae Sedis	0	0	0	2
Candidatus Levybacteria	0	0	0	0	0	0	0	2		Candidatus Levybacteria	0	0	0	1
uncultured Aquificales bacterium	0	0	0	0	0	0	0	2		uncultured Aquificales bacterium	0	0	0	1
Candidatus Nomurabacteria	0	0	0	0	0	0	0	1		Candidatus Nomurabacteria	0	0	0	0.5
S0134 terrestrial group	0	0	0	0	0	0	0	1		S0134 terrestrial group	0	0	0	0.5
uncultured candidate division BRC1 bacterium	0	0	0	0	0	0	0	1		uncultured candidate division BRC1 bacterium	0	0	0	0.5
43831	0	0	0	0	0	0	0	1		43831	0	0	0	0.5

## Sheet: Genus 
Genus represented as others
Level6	ES1	ES2	EW1	EW2	Tuwa_S1	Tuwa_S2	Unai_S1	Unai_S2			Level6 (Average)	ES	EW	Tuwa_S	Unnai_S
Paenibacillus	215	237	168	159	1	2	2	6			Paenibacillus	226	163.5	1.5	4
Psychrilyobacter	111	96	59	60	0	0	0	2			Psychrilyobacter	103.5	59.5	0	1
Eisenbergiella	99	493	254	220	0	0	0	1			Eisenbergiella	296	237	0	0.5
Aneurinibacillus	90	122	69	59	0	0	0	0			Aneurinibacillus	106	64	0	0
[Eubacterium] oxidoreducens group	37	148	49	47	0	0	0	0			[Eubacterium] oxidoreducens group	92.5	48	0	0
Berkelbacteria bacterium GW2011_GWA2_38_9	31	51	31	24	0	0	0	0			Berkelbacteria bacterium GW2011_GWA2_38_9	41	27.5	0	0
Solibacillus	8	17	1	7	0	0	0	0			Solibacillus	12.5	4	0	0
Caldanaerobacter	7	12	9	7	2	0	0	0			Caldanaerobacter	9.5	8	1	0
Bacillaceae bacterium mt6	6	10	3	3	0	0	0	0			Bacillaceae bacterium mt6	8	3	0	0
Caldibacillus	2	7	5	2	0	0	0	0			Caldibacillus	4.5	3.5	0	0
Exiguobacterium	2	3	1	3	0	0	0	0			Exiguobacterium	2.5	2	0	0
Jeotgalibacillus	2	0	2	0	0	0	0	0			Jeotgalibacillus	1	1	0	0
Syntrophomonas	1	3	1	0	0	0	0	0			Syntrophomonas	2	0.5	0	0
Halobacillus	1	3	0	1	0	0	0	0			Halobacillus	2	0.5	0	0
Oceanobacillus	1	2	1	2	0	0	0	0			Oceanobacillus	1.5	1.5	0	0
Sporolactobacillus	1	1	0	0	0	0	0	0			Sporolactobacillus	1	0	0	0
Lysinibacillus	1	0	2	0	0	0	0	0			Lysinibacillus	0.5	1	0	0
Ruminococcus 1	1	0	1	1	0	0	0	0			Ruminococcus 1	0.5	1	0	0
Novosphingobium	1	0	0	0	1	0	1	0			Novosphingobium	0.5	0	0.5	0.5
Calditerricola	1	0	0	0	1	0	0	0			Calditerricola	0.5	0	0.5	0
Alicyclobacillus	1	0	0	0	0	1	2	0			Alicyclobacillus	0.5	0	0.5	1
Ruminococcaceae UCG-013	1	0	0	0	0	0	0	4			Ruminococcaceae UCG-013	0.5	0	0	2
Caldalkalibacillus	1	0	0	0	0	0	0	0			Caldalkalibacillus	0.5	0	0	0
Ammoniibacillus	0	2	1	2	0	0	0	1			Ammoniibacillus	1	1.5	0	0.5
Natribacillus	0	2	0	0	0	0	0	0			Natribacillus	1	0	0	0
Ureibacillus	0	1	2	5	0	0	0	0			Ureibacillus	0.5	3.5	0	0
Longilinea	0	1	1	0	6	3	12	13			Longilinea	0.5	0.5	4.5	12.5
Candidatus Collierbacteria bacterium GW2011_GWA2_42_17	0	1	0	1	0	0	0	0			Candidatus Collierbacteria bacterium GW2011_GWA2_42_17	0.5	0.5	0	0
Lactobacillus	0	1	0	1	0	0	0	0			Lactobacillus	0.5	0.5	0	0
Mesorhizobium	0	1	0	0	4	1	0	0			Mesorhizobium	0.5	0	2.5	0
Thermoanaerobacter	0	1	0	0	1	3	1	1			Thermoanaerobacter	0.5	0	2	1
[Eubacterium] coprostanoligenes group	0	1	0	0	1	1	0	0			[Eubacterium] coprostanoligenes group	0.5	0	1	0
SP3-e08	0	1	0	0	0	0	1	0			SP3-e08	0.5	0	0	0.5
Natranaerobius	0	1	0	0	0	0	0	0			Natranaerobius	0.5	0	0	0
Psychrobacillus	0	1	0	0	0	0	0	0			Psychrobacillus	0.5	0	0	0
Sarcina	0	1	0	0	0	0	0	0			Sarcina	0.5	0	0	0
Thermosipho	0	1	0	0	0	0	0	0			Thermosipho	0.5	0	0	0
Sporosarcina	0	0	1	0	1	0	6	5			Sporosarcina	0	0.5	0.5	5.5
Candidatus Soleaferrea	0	0	1	0	0	0	0	0			Candidatus Soleaferrea	0	0.5	0	0
Fodinicola	0	0	1	0	0	0	0	0			Fodinicola	0	0.5	0	0
Weissella	0	0	1	0	0	0	0	0			Weissella	0	0.5	0	0
Streptomyces	0	0	0	1	13	9	8	15			Streptomyces	0	0.5	11	11.5
Phascolarctobacterium	0	0	0	1	0	1	0	0			Phascolarctobacterium	0	0.5	0.5	0
Bombella	0	0	0	1	0	0	0	0			Bombella	0	0.5	0	0
Pantoea	0	0	0	1	0	0	0	0			Pantoea	0	0.5	0	0
Sedimentibacter	0	0	0	1	0	0	0	0			Sedimentibacter	0	0.5	0	0
uncultured SB1 group bacterium	0	0	0	1	0	0	0	0			uncultured SB1 group bacterium	0	0.5	0	0
45597	0	0	0	0	43	29	3	4			45597	0	0	36	3.5
[Desulfobacterium] catecholicum group	0	0	0	0	40	25	0	2			[Desulfobacterium] catecholicum group	0	0	32.5	1
Pseudothermotoga	0	0	0	0	37	18	8	3			Pseudothermotoga	0	0	27.5	5.5
Shewanella	0	0	0	0	29	18	7	22			Shewanella	0	0	23.5	14.5
Hydrogenophilus	0	0	0	0	29	12	0	0			Hydrogenophilus	0	0	20.5	0
Sulfuricurvum	0	0	0	0	27	13	8	4			Sulfuricurvum	0	0	20	6
Thermofilum	0	0	0	0	26	0	0	1			Thermofilum	0	0	13	0.5
Ruminiclostridium 1	0	0	0	0	24	19	7	4			Ruminiclostridium 1	0	0	21.5	5.5
Hydrogenobacter	0	0	0	0	23	45	2	5			Hydrogenobacter	0	0	34	3.5
Sulfurihydrogenibium	0	0	0	0	22	32	47	58			Sulfurihydrogenibium	0	0	27	52.5
Algoriphagus	0	0	0	0	22	23	0	3			Algoriphagus	0	0	22.5	1.5
Candidatus Acetothermus	0	0	0	0	20	16	1	9			Candidatus Acetothermus	0	0	18	5
uncultured Chlorobi bacterium	0	0	0	0	20	8	12	16			uncultured Chlorobi bacterium	0	0	14	14
Rhodobacter	0	0	0	0	19	2	0	0			Rhodobacter	0	0	10.5	0
Brevinema	0	0	0	0	17	20	2	4			Brevinema	0	0	18.5	3
Desulfovibrio	0	0	0	0	16	18	3	7			Desulfovibrio	0	0	17	5
uncultured organism	0	0	0	0	15	13	3	2			uncultured organism	0	0	14	2.5
Caenispirillum	0	0	0	0	14	23	0	3			Caenispirillum	0	0	18.5	1.5
Rhodovulum	0	0	0	0	14	6	14	6			Rhodovulum	0	0	10	10
Venenivibrio	0	0	0	0	13	23	2	8			Venenivibrio	0	0	18	5
Desulfurispora	0	0	0	0	13	9	2	3			Desulfurispora	0	0	11	2.5
AUTHM297	0	0	0	0	12	1	0	0			AUTHM297	0	0	6.5	0
Thermocrinis	0	0	0	0	10	10	0	2			Thermocrinis	0	0	10	1
uncultured Stella sp.	0	0	0	0	10	2	0	0			uncultured Stella sp.	0	0	6	0
Mesotoga	0	0	0	0	9	3	0	2			Mesotoga	0	0	6	1
Candidatus Caldatribacterium	0	0	0	0	9	2	9	7			Candidatus Caldatribacterium	0	0	5.5	8
Tepidimonas	0	0	0	0	9	1	1	0			Tepidimonas	0	0	5	0.5
miscellaneous Crenarchaeota group archaeon SMTZ1-55	0	0	0	0	8	2	0	0			miscellaneous Crenarchaeota group archaeon SMTZ1-55	0	0	5	0
uncultured crenarchaeote	0	0	0	0	8	1	0	0			uncultured crenarchaeote	0	0	4.5	0
Ornatilinea	0	0	0	0	7	17	11	26			Ornatilinea	0	0	12	18.5
Thermoanaerobaculum	0	0	0	0	7	1	85	45			Thermoanaerobaculum	0	0	4	65
Paludibaculum	0	0	0	0	6	14	10	9			Paludibaculum	0	0	10	9.5
Piscirickettsia	0	0	0	0	6	6	1	11			Piscirickettsia	0	0	6	6
Pseudohongiella	0	0	0	0	6	2	0	1			Pseudohongiella	0	0	4	0.5
Salmonella	0	0	0	0	6	2	0	1			Salmonella	0	0	4	0.5
Tepidimicrobium	0	0	0	0	6	1	0	1			Tepidimicrobium	0	0	3.5	0.5
H16	0	0	0	0	5	4	14	13			H16	0	0	4.5	13.5
Sva0081 sediment group	0	0	0	0	5	4	1	4			Sva0081 sediment group	0	0	4.5	2.5
Christensenellaceae R-7 group	0	0	0	0	5	4	1	2			Christensenellaceae R-7 group	0	0	4.5	1.5
Symbiobacterium	0	0	0	0	5	4	0	2			Symbiobacterium	0	0	4.5	1
candidate division OP10 clone OPB50	0	0	0	0	5	4	0	0			candidate division OP10 clone OPB50	0	0	4.5	0
Syntrophorhabdus	0	0	0	0	5	1	2	2			Syntrophorhabdus	0	0	3	2
Fusibacter	0	0	0	0	5	1	1	0			Fusibacter	0	0	3	0.5
Treponema 2	0	0	0	0	5	1	0	0			Treponema 2	0	0	3	0
Sphingomonas	0	0	0	0	4	7	2	10			Sphingomonas	0	0	5.5	6
Thermotoga	0	0	0	0	4	6	10	1			Thermotoga	0	0	5	5.5
Klebsiella	0	0	0	0	4	5	0	0			Klebsiella	0	0	4.5	0
Succiniclasticum	0	0	0	0	4	4	0	0			Succiniclasticum	0	0	4	0
Gracilibacter	0	0	0	0	4	3	2	0			Gracilibacter	0	0	3.5	1
Desulfocarbo	0	0	0	0	4	3	0	0			Desulfocarbo	0	0	3.5	0
Thauera	0	0	0	0	4	2	10	21			Thauera	0	0	3	15.5
Gallicola	0	0	0	0	4	2	0	3			Gallicola	0	0	3	1.5
Dysgonomonas	0	0	0	0	4	2	0	1			Dysgonomonas	0	0	3	0.5
Leptospirillum	0	0	0	0	4	0	2	3			Leptospirillum	0	0	2	2.5
Prolixibacter	0	0	0	0	4	0	0	1			Prolixibacter	0	0	2	0.5
Desulfovirgula	0	0	0	0	4	0	0	0			Desulfovirgula	0	0	2	0
Enterobacter	0	0	0	0	4	0	0	0			Enterobacter	0	0	2	0
Kroppenstedtia	0	0	0	0	4	0	0	0			Kroppenstedtia	0	0	2	0
Bryobacter	0	0	0	0	3	4	3	9			Bryobacter	0	0	3.5	6
Phenylobacterium	0	0	0	0	3	3	7	13			Phenylobacterium	0	0	3	10
Methylothermus	0	0	0	0	3	3	1	2			Methylothermus	0	0	3	1.5
Pelotomaculum	0	0	0	0	3	3	0	0			Pelotomaculum	0	0	3	0
uncultured actinobacterium	0	0	0	0	3	2	1	3			uncultured actinobacterium	0	0	2.5	2
Ruminococcaceae UCG-014	0	0	0	0	3	2	1	1			Ruminococcaceae UCG-014	0	0	2.5	1
Clostridium sensu stricto 8	0	0	0	0	3	2	0	0			Clostridium sensu stricto 8	0	0	2.5	0
uncultured gamma proteobacterium	0	0	0	0	3	2	0	0			uncultured gamma proteobacterium	0	0	2.5	0
Acidovorax	0	0	0	0	3	1	5	8			Acidovorax	0	0	2	6.5
Treponema	0	0	0	0	3	1	0	0			Treponema	0	0	2	0
Schleiferia	0	0	0	0	3	0	1	1			Schleiferia	0	0	1.5	1
Thermacetogenium	0	0	0	0	3	0	0	1			Thermacetogenium	0	0	1.5	0.5
Thermobrachium	0	0	0	0	3	0	0	1			Thermobrachium	0	0	1.5	0.5
Cupriavidus	0	0	0	0	3	0	0	0			Cupriavidus	0	0	1.5	0
Desulfocapsa	0	0	0	0	3	0	0	0			Desulfocapsa	0	0	1.5	0
Haemophilus	0	0	0	0	3	0	0	0			Haemophilus	0	0	1.5	0
Lutispora	0	0	0	0	3	0	0	0			Lutispora	0	0	1.5	0
Thermonema	0	0	0	0	3	0	0	0			Thermonema	0	0	1.5	0
Clostridium sensu stricto 1	0	0	0	0	2	10	2	3			Clostridium sensu stricto 1	0	0	6	2.5
SC103	0	0	0	0	2	6	0	0			SC103	0	0	4	0
Zoogloea	0	0	0	0	2	6	0	0			Zoogloea	0	0	4	0
Thermomarinilinea	0	0	0	0	2	5	1	0			Thermomarinilinea	0	0	3.5	0.5
Desulfatiglans	0	0	0	0	2	4	16	7			Desulfatiglans	0	0	3	11.5
Limisphaera	0	0	0	0	2	4	4	22			Limisphaera	0	0	3	13
Chloroflexus	0	0	0	0	2	4	0	5			Chloroflexus	0	0	3	2.5
Magnetospirillum	0	0	0	0	2	4	0	1			Magnetospirillum	0	0	3	0.5
uncultured candidate division GN04 bacterium	0	0	0	0	2	4	0	0			uncultured candidate division GN04 bacterium	0	0	3	0
Solanum melongena (eggplant)	0	0	0	0	2	3	0	0			Solanum melongena (eggplant)	0	0	2.5	0
PAUC26f	0	0	0	0	2	2	21	4			PAUC26f	0	0	2	12.5
Ammonifex	0	0	0	0	2	2	1	0			Ammonifex	0	0	2	0.5
Phaeodactylibacter	0	0	0	0	2	2	0	1			Phaeodactylibacter	0	0	2	0.5
Desulfitibacter	0	0	0	0	2	2	0	0			Desulfitibacter	0	0	2	0
GOUTB8	0	0	0	0	2	1	11	7			GOUTB8	0	0	1.5	9
Azoarcus	0	0	0	0	2	1	0	5			Azoarcus	0	0	1.5	2.5
Thermodesulfobacterium	0	0	0	0	2	1	0	1			Thermodesulfobacterium	0	0	1.5	0.5
bioreactor metagenome	0	0	0	0	2	1	0	0			bioreactor metagenome	0	0	1.5	0
SEEP-SRB1	0	0	0	0	2	1	0	0			SEEP-SRB1	0	0	1.5	0
Tetrasphaera	0	0	0	0	2	1	0	0			Tetrasphaera	0	0	1.5	0
Thermosyntropha	0	0	0	0	2	1	0	0			Thermosyntropha	0	0	1.5	0
Candidatus Wolfebacteria bacterium GW2011_GWC1_43_10	0	0	0	0	2	0	71	45			Candidatus Wolfebacteria bacterium GW2011_GWC1_43_10	0	0	1	58
uncultured Parcubacteria group bacterium	0	0	0	0	2	0	20	6			uncultured Parcubacteria group bacterium	0	0	1	13
Sideroxydans	0	0	0	0	2	0	2	1			Sideroxydans	0	0	1	1.5
[Eubacterium] rectale group	0	0	0	0	2	0	0	0			[Eubacterium] rectale group	0	0	1	0
Candidatus Xenolissoclinum	0	0	0	0	2	0	0	0			Candidatus Xenolissoclinum	0	0	1	0
Delftia	0	0	0	0	2	0	0	0			Delftia	0	0	1	0
Flavobacterium	0	0	0	0	2	0	0	0			Flavobacterium	0	0	1	0
Granulicoccus	0	0	0	0	2	0	0	0			Granulicoccus	0	0	1	0
Heliobacillus	0	0	0	0	2	0	0	0			Heliobacillus	0	0	1	0
MWH-UniP1 aquatic group	0	0	0	0	2	0	0	0			MWH-UniP1 aquatic group	0	0	1	0
Nitella hyalina	0	0	0	0	2	0	0	0			Nitella hyalina	0	0	1	0
Parvimonas	0	0	0	0	2	0	0	0			Parvimonas	0	0	1	0
Pleomorphomonas	0	0	0	0	2	0	0	0			Pleomorphomonas	0	0	1	0
Puniceicoccus	0	0	0	0	2	0	0	0			Puniceicoccus	0	0	1	0
Sulfurimonas	0	0	0	0	2	0	0	0			Sulfurimonas	0	0	1	0
Syntrophus	0	0	0	0	2	0	0	0			Syntrophus	0	0	1	0
Thermanaerovibrio	0	0	0	0	2	0	0	0			Thermanaerovibrio	0	0	1	0
uncultured Rickettsia sp.	0	0	0	0	2	0	0	0			uncultured Rickettsia sp.	0	0	1	0
Oxobacter	0	0	0	0	1	9	0	4			Oxobacter	0	0	5	2
Desulfobulbus	0	0	0	0	1	9	0	0			Desulfobulbus	0	0	5	0
Acetivibrio	0	0	0	0	1	5	0	3			Acetivibrio	0	0	3	1.5
Desulfuromonas	0	0	0	0	1	3	2	0			Desulfuromonas	0	0	2	1
Epulopiscium	0	0	0	0	1	3	1	0			Epulopiscium	0	0	2	0.5
Azospirillum	0	0	0	0	1	3	0	1			Azospirillum	0	0	2	0.5
Pelolinea	0	0	0	0	1	3	0	1			Pelolinea	0	0	2	0.5
Alterococcus	0	0	0	0	1	3	0	0			Alterococcus	0	0	2	0
Draconibacterium	0	0	0	0	1	3	0	0			Draconibacterium	0	0	2	0
Ignavibacterium	0	0	0	0	1	2	34	44			Ignavibacterium	0	0	1.5	39
Tepidiphilus	0	0	0	0	1	2	3	14			Tepidiphilus	0	0	1.5	8.5
Anaerobaculum	0	0	0	0	1	2	2	0			Anaerobaculum	0	0	1.5	1
uncultured delta proteobacterium	0	0	0	0	1	2	2	0			uncultured delta proteobacterium	0	0	1.5	1
marine metagenome	0	0	0	0	1	2	1	7			marine metagenome	0	0	1.5	4
Defluviitalea	0	0	0	0	1	2	1	0			Defluviitalea	0	0	1.5	0.5
Truepera	0	0	0	0	1	2	0	1			Truepera	0	0	1.5	0.5
Nitrospina	0	0	0	0	1	2	0	0			Nitrospina	0	0	1.5	0
termite gut metagenome	0	0	0	0	1	2	0	0			termite gut metagenome	0	0	1.5	0
Desulfonema	0	0	0	0	1	1	5	7			Desulfonema	0	0	1	6
Caloramator	0	0	0	0	1	1	4	11			Caloramator	0	0	1	7.5
Planctomyces	0	0	0	0	1	1	1	2			Planctomyces	0	0	1	1.5
Thermobaculum	0	0	0	0	1	1	1	2			Thermobaculum	0	0	1	1.5
Rikenellaceae RC9 gut group	0	0	0	0	1	1	0	2			Rikenellaceae RC9 gut group	0	0	1	1
Clostridium sp. JC3	0	0	0	0	1	1	0	1			Clostridium sp. JC3	0	0	1	0.5
Erythrobacter	0	0	0	0	1	1	0	1			Erythrobacter	0	0	1	0.5
Sphingopyxis	0	0	0	0	1	1	0	1			Sphingopyxis	0	0	1	0.5
Thermanaeromonas	0	0	0	0	1	1	0	1			Thermanaeromonas	0	0	1	0.5
Cloacibacterium	0	0	0	0	1	1	0	0			Cloacibacterium	0	0	1	0
Clostridium sensu stricto 18	0	0	0	0	1	1	0	0			Clostridium sensu stricto 18	0	0	1	0
Ercella	0	0	0	0	1	1	0	0			Ercella	0	0	1	0
Haematobacter	0	0	0	0	1	1	0	0			Haematobacter	0	0	1	0
Lachnospiraceae UCG-008	0	0	0	0	1	1	0	0			Lachnospiraceae UCG-008	0	0	1	0
Leptospira	0	0	0	0	1	1	0	0			Leptospira	0	0	1	0
Opitutus	0	0	0	0	1	1	0	0			Opitutus	0	0	1	0
Paracoccus	0	0	0	0	1	1	0	0			Paracoccus	0	0	1	0
Thioalkalispira	0	0	0	0	1	1	0	0			Thioalkalispira	0	0	1	0
uncultured Bacteroidetes bacterium	0	0	0	0	1	1	0	0			uncultured Bacteroidetes bacterium	0	0	1	0
uncultured Fibrobacteres bacterium	0	0	0	0	1	1	0	0			uncultured Fibrobacteres bacterium	0	0	1	0
Parcubacteria group bacterium GW2011_GWA2_47_9	0	0	0	0	1	0	9	0			Parcubacteria group bacterium GW2011_GWA2_47_9	0	0	0.5	4.5
Gemmata	0	0	0	0	1	0	7	12			Gemmata	0	0	0.5	9.5
uncultured euryarchaeote	0	0	0	0	1	0	2	5			uncultured euryarchaeote	0	0	0.5	3.5
Hippea	0	0	0	0	1	0	2	1			Hippea	0	0	0.5	1.5
OM27 clade	0	0	0	0	1	0	2	1			OM27 clade	0	0	0.5	1.5
G55	0	0	0	0	1	0	2	0			G55	0	0	0.5	1
Lysobacter	0	0	0	0	1	0	1	3			Lysobacter	0	0	0.5	2
Limnohabitans	0	0	0	0	1	0	1	1			Limnohabitans	0	0	0.5	1
Desulfothermus	0	0	0	0	1	0	1	0			Desulfothermus	0	0	0.5	0.5
Roseovarius	0	0	0	0	1	0	1	0			Roseovarius	0	0	0.5	0.5
Ruminococcaceae UCG-012	0	0	0	0	1	0	1	0			Ruminococcaceae UCG-012	0	0	0.5	0.5
uncultured Microgenomates group bacterium	0	0	0	0	1	0	0	7			uncultured Microgenomates group bacterium	0	0	0.5	3.5
Ruminococcaceae UCG-010	0	0	0	0	1	0	0	4			Ruminococcaceae UCG-010	0	0	0.5	2
Paeniclostridium	0	0	0	0	1	0	0	2			Paeniclostridium	0	0	0.5	1
Undibacterium	0	0	0	0	1	0	0	2			Undibacterium	0	0	0.5	1
Asticcacaulis	0	0	0	0	1	0	0	1			Asticcacaulis	0	0	0.5	0.5
Roseomonas	0	0	0	0	1	0	0	1			Roseomonas	0	0	0.5	0.5
Sulfurovum	0	0	0	0	1	0	0	1			Sulfurovum	0	0	0.5	0.5
uncultured Firmicutes bacterium	0	0	0	0	1	0	0	1			uncultured Firmicutes bacterium	0	0	0.5	0.5
uncultured microorganism	0	0	0	0	1	0	0	1			uncultured microorganism	0	0	0.5	0.5
Xanthomonas	0	0	0	0	1	0	0	1			Xanthomonas	0	0	0.5	0.5
[Agitococcus] lubricus group	0	0	0	0	1	0	0	0			[Agitococcus] lubricus group	0	0	0.5	0
[Eubacterium] brachy group	0	0	0	0	1	0	0	0			[Eubacterium] brachy group	0	0	0.5	0
[Eubacterium] nodatum group	0	0	0	0	1	0	0	0			[Eubacterium] nodatum group	0	0	0.5	0
Alsobacter	0	0	0	0	1	0	0	0			Alsobacter	0	0	0.5	0
Aminiphilus	0	0	0	0	1	0	0	0			Aminiphilus	0	0	0.5	0
Amphiplicatus	0	0	0	0	1	0	0	0			Amphiplicatus	0	0	0.5	0
Anaerococcus	0	0	0	0	1	0	0	0			Anaerococcus	0	0	0.5	0
Arenibacter	0	0	0	0	1	0	0	0			Arenibacter	0	0	0.5	0
Butyrivibrio 2	0	0	0	0	1	0	0	0			Butyrivibrio 2	0	0	0.5	0
Candidatus Chloracidobacterium	0	0	0	0	1	0	0	0			Candidatus Chloracidobacterium	0	0	0.5	0
Cerasicoccus	0	0	0	0	1	0	0	0			Cerasicoccus	0	0	0.5	0
Desulfobacter	0	0	0	0	1	0	0	0			Desulfobacter	0	0	0.5	0
Desulfocella	0	0	0	0	1	0	0	0			Desulfocella	0	0	0.5	0
Desulfococcus	0	0	0	0	1	0	0	0			Desulfococcus	0	0	0.5	0
Desulfosporosinus	0	0	0	0	1	0	0	0			Desulfosporosinus	0	0	0.5	0
Ensifer	0	0	0	0	1	0	0	0			Ensifer	0	0	0.5	0
Erysipelothrix	0	0	0	0	1	0	0	0			Erysipelothrix	0	0	0.5	0
Hydrogenibacillus	0	0	0	0	1	0	0	0			Hydrogenibacillus	0	0	0.5	0
Hydrogenobaculum	0	0	0	0	1	0	0	0			Hydrogenobaculum	0	0	0.5	0
Hydrogenophaga	0	0	0	0	1	0	0	0			Hydrogenophaga	0	0	0.5	0
Jhaorihella	0	0	0	0	1	0	0	0			Jhaorihella	0	0	0.5	0
Leptolinea	0	0	0	0	1	0	0	0			Leptolinea	0	0	0.5	0
marine group	0	0	0	0	1	0	0	0			marine group	0	0	0.5	0
Methanosarcina	0	0	0	0	1	0	0	0			Methanosarcina	0	0	0.5	0
Methanospirillum	0	0	0	0	1	0	0	0			Methanospirillum	0	0	0.5	0
Mucispirillum	0	0	0	0	1	0	0	0			Mucispirillum	0	0	0.5	0
Nitrobacter	0	0	0	0	1	0	0	0			Nitrobacter	0	0	0.5	0
Oceanotoga	0	0	0	0	1	0	0	0			Oceanotoga	0	0	0.5	0
Quinella	0	0	0	0	1	0	0	0			Quinella	0	0	0.5	0
Tangfeifania	0	0	0	0	1	0	0	0			Tangfeifania	0	0	0.5	0
Thermoleophilum	0	0	0	0	1	0	0	0			Thermoleophilum	0	0	0.5	0
Victivallis	0	0	0	0	1	0	0	0			Victivallis	0	0	0.5	0
Cetobacterium	0	0	0	0	0	9	0	0			Cetobacterium	0	0	4.5	0
Caldilinea	0	0	0	0	0	6	6	4			Caldilinea	0	0	3	5
Anaerolinea	0	0	0	0	0	5	41	50			Anaerolinea	0	0	2.5	45.5
Dehalobacter	0	0	0	0	0	5	0	0			Dehalobacter	0	0	2.5	0
Candidatus Solibacter	0	0	0	0	0	4	7	7			Candidatus Solibacter	0	0	2	7
Aminivibrio	0	0	0	0	0	4	0	0			Aminivibrio	0	0	2	0
uncultured Chloroflexi bacterium	0	0	0	0	0	3	3	4			uncultured Chloroflexi bacterium	0	0	1.5	3.5
Limnobacter	0	0	0	0	0	3	1	0			Limnobacter	0	0	1.5	0.5
uncultured Armatimonadetes bacterium	0	0	0	0	0	3	0	2			uncultured Armatimonadetes bacterium	0	0	1.5	1
Rs-M59 termite group	0	0	0	0	0	3	0	0			Rs-M59 termite group	0	0	1.5	0
Blvii28 wastewater-sludge group	0	0	0	0	0	2	0	1			Blvii28 wastewater-sludge group	0	0	1	0.5
Candidatus Latescibacter	0	0	0	0	0	2	0	1			Candidatus Latescibacter	0	0	1	0.5
uncultured Verrucomicrobia bacterium	0	0	0	0	0	2	0	1			uncultured Verrucomicrobia bacterium	0	0	1	0.5
bacterium YC-ZSS-LKJ74	0	0	0	0	0	2	0	0			bacterium YC-ZSS-LKJ74	0	0	1	0
Bacteroides	0	0	0	0	0	2	0	0			Bacteroides	0	0	1	0
Leptonema	0	0	0	0	0	2	0	0			Leptonema	0	0	1	0
Marine group II euryarchaeote REDSEA-S29_B8N9	0	0	0	0	0	2	0	0			Marine group II euryarchaeote REDSEA-S29_B8N9	0	0	1	0
Pelagibius	0	0	0	0	0	2	0	0			Pelagibius	0	0	1	0
Petrimonas	0	0	0	0	0	2	0	0			Petrimonas	0	0	1	0
uncultured alpha proteobacterium	0	0	0	0	0	2	0	0			uncultured alpha proteobacterium	0	0	1	0
uncultured bacterium UASB_TL56	0	0	0	0	0	2	0	0			uncultured bacterium UASB_TL56	0	0	1	0
uncultured soil bacterium	0	0	0	0	0	1	16	5			uncultured soil bacterium	0	0	0.5	10.5
Spirochaeta 2	0	0	0	0	0	1	6	5			Spirochaeta 2	0	0	0.5	5.5
Sphaerochaeta	0	0	0	0	0	1	5	10			Sphaerochaeta	0	0	0.5	7.5
Comamonas	0	0	0	0	0	1	3	1			Comamonas	0	0	0.5	2
Pirellula	0	0	0	0	0	1	2	5			Pirellula	0	0	0.5	3.5
Desulfomonile	0	0	0	0	0	1	1	5			Desulfomonile	0	0	0.5	3
Microbacterium	0	0	0	0	0	1	1	0			Microbacterium	0	0	0.5	0.5
Thermincola	0	0	0	0	0	1	1	0			Thermincola	0	0	0.5	0.5
uncultured planctomycete	0	0	0	0	0	1	1	0			uncultured planctomycete	0	0	0.5	0.5
Candidatus Woesebacteria bacterium GW2011_GWB1_41_10	0	0	0	0	0	1	0	7			Candidatus Woesebacteria bacterium GW2011_GWB1_41_10	0	0	0.5	3.5
Arcobacter	0	0	0	0	0	1	0	4			Arcobacter	0	0	0.5	2
Variibacter	0	0	0	0	0	1	0	3			Variibacter	0	0	0.5	1.5
Colwellia	0	0	0	0	0	1	0	1			Colwellia	0	0	0.5	0.5
Aciditerrimonas	0	0	0	0	0	1	0	0			Aciditerrimonas	0	0	0.5	0
Acidothermus	0	0	0	0	0	1	0	0			Acidothermus	0	0	0.5	0
Actinomyces	0	0	0	0	0	1	0	0			Actinomyces	0	0	0.5	0
Alkaliflexus	0	0	0	0	0	1	0	0			Alkaliflexus	0	0	0.5	0
Anaeroplasma	0	0	0	0	0	1	0	0			Anaeroplasma	0	0	0.5	0
Arthrobacter	0	0	0	0	0	1	0	0			Arthrobacter	0	0	0.5	0
Berkelbacteria bacterium GW2011_GWA2_35_9	0	0	0	0	0	1	0	0			Berkelbacteria bacterium GW2011_GWA2_35_9	0	0	0.5	0
Candidatus Paraholospora	0	0	0	0	0	1	0	0			Candidatus Paraholospora	0	0	0.5	0
Carboxylicivirga	0	0	0	0	0	1	0	0			Carboxylicivirga	0	0	0.5	0
Catenibacterium	0	0	0	0	0	1	0	0			Catenibacterium	0	0	0.5	0
Denitrovibrio	0	0	0	0	0	1	0	0			Denitrovibrio	0	0	0.5	0
Desulfatirhabdium	0	0	0	0	0	1	0	0			Desulfatirhabdium	0	0	0.5	0
Ekhidna	0	0	0	0	0	1	0	0			Ekhidna	0	0	0.5	0
Erysipelatoclostridium	0	0	0	0	0	1	0	0			Erysipelatoclostridium	0	0	0.5	0
Ferruginibacter	0	0	0	0	0	1	0	0			Ferruginibacter	0	0	0.5	0
Guggenheimella	0	0	0	0	0	1	0	0			Guggenheimella	0	0	0.5	0
Leptobacterium	0	0	0	0	0	1	0	0			Leptobacterium	0	0	0.5	0
M2PB4-61 termite group	0	0	0	0	0	1	0	0			M2PB4-61 termite group	0	0	0.5	0
Mahella	0	0	0	0	0	1	0	0			Mahella	0	0	0.5	0
Methanothermobacter	0	0	0	0	0	1	0	0			Methanothermobacter	0	0	0.5	0
Methylobacillus	0	0	0	0	0	1	0	0			Methylobacillus	0	0	0.5	0
Methylobacterium	0	0	0	0	0	1	0	0			Methylobacterium	0	0	0.5	0
microbial mat metagenome	0	0	0	0	0	1	0	0			microbial mat metagenome	0	0	0.5	0
Mycoplasma	0	0	0	0	0	1	0	0			Mycoplasma	0	0	0.5	0
Nanoarchaeota archaeon SCGC AAA011-D5	0	0	0	0	0	1	0	0			Nanoarchaeota archaeon SCGC AAA011-D5	0	0	0.5	0
Ochrobactrum	0	0	0	0	0	1	0	0			Ochrobactrum	0	0	0.5	0
Ruminococcus 2	0	0	0	0	0	1	0	0			Ruminococcus 2	0	0	0.5	0
SEEP-SRB4	0	0	0	0	0	1	0	0			SEEP-SRB4	0	0	0.5	0
Selenomonas	0	0	0	0	0	1	0	0			Selenomonas	0	0	0.5	0
Sulfobacillus	0	0	0	0	0	1	0	0			Sulfobacillus	0	0	0.5	0
Sulfuritalea	0	0	0	0	0	1	0	0			Sulfuritalea	0	0	0.5	0
Thermolithobacter	0	0	0	0	0	1	0	0			Thermolithobacter	0	0	0.5	0
Thermovenabulum	0	0	0	0	0	1	0	0			Thermovenabulum	0	0	0.5	0
Thiomonas	0	0	0	0	0	1	0	0			Thiomonas	0	0	0.5	0
uncultured candidate division WS6 bacterium	0	0	0	0	0	1	0	0			uncultured candidate division WS6 bacterium	0	0	0.5	0
Caldinitratiruptor	0	0	0	0	0	0	25	31			Caldinitratiruptor	0	0	0	28
Carboxydocella	0	0	0	0	0	0	13	21			Carboxydocella	0	0	0	17
Rhabdothermus	0	0	0	0	0	0	5	12			Rhabdothermus	0	0	0	8.5
Caldisericum	0	0	0	0	0	0	4	1			Caldisericum	0	0	0	2.5
uncultured Acidobacteria bacterium	0	0	0	0	0	0	3	6			uncultured Acidobacteria bacterium	0	0	0	4.5
Thermodesulforhabdus	0	0	0	0	0	0	3	2			Thermodesulforhabdus	0	0	0	2.5
Candidatus Giovannonibacteria bacterium GW2011_GWF2_42_19	0	0	0	0	0	0	3	1			Candidatus Giovannonibacteria bacterium GW2011_GWF2_42_19	0	0	0	2
Fonticella	0	0	0	0	0	0	3	1			Fonticella	0	0	0	2
Tepidanaerobacter	0	0	0	0	0	0	3	1			Tepidanaerobacter	0	0	0	2
Thermovirga	0	0	0	0	0	0	3	1			Thermovirga	0	0	0	2
Candidatus Hydrogenedens	0	0	0	0	0	0	3	0			Candidatus Hydrogenedens	0	0	0	1.5
Polynucleobacter	0	0	0	0	0	0	3	0			Polynucleobacter	0	0	0	1.5
unidentified bacterium wb1_P19	0	0	0	0	0	0	3	0			unidentified bacterium wb1_P19	0	0	0	1.5
uncultured deep-sea bacterium	0	0	0	0	0	0	2	2			uncultured deep-sea bacterium	0	0	0	2
Candidatus Jorgensenbacteria bacterium GW2011_GWA2_45_9	0	0	0	0	0	0	2	1			Candidatus Jorgensenbacteria bacterium GW2011_GWA2_45_9	0	0	0	1.5
Dissulfurimicrobium	0	0	0	0	0	0	2	1			Dissulfurimicrobium	0	0	0	1.5
Parcubacteria bacterium DG_74_3	0	0	0	0	0	0	2	1			Parcubacteria bacterium DG_74_3	0	0	0	1.5
Thermomonas	0	0	0	0	0	0	2	1			Thermomonas	0	0	0	1.5
Brockia	0	0	0	0	0	0	2	0			Brockia	0	0	0	1
Candidatus Jorgensenbacteria bacterium GW2011_GWF2_41_8	0	0	0	0	0	0	2	0			Candidatus Jorgensenbacteria bacterium GW2011_GWF2_41_8	0	0	0	1
Carboxydothermus	0	0	0	0	0	0	2	0			Carboxydothermus	0	0	0	1
Clostridiales bacterium PH28_bin88	0	0	0	0	0	0	2	0			Clostridiales bacterium PH28_bin88	0	0	0	1
Methanomassiliicoccus	0	0	0	0	0	0	2	0			Methanomassiliicoccus	0	0	0	1
Mycobacterium	0	0	0	0	0	0	2	0			Mycobacterium	0	0	0	1
Nitratiruptor	0	0	0	0	0	0	2	0			Nitratiruptor	0	0	0	1
Parcubacteria bacterium SCGC AAA010-E09	0	0	0	0	0	0	2	0			Parcubacteria bacterium SCGC AAA010-E09	0	0	0	1
Rubrobacter	0	0	0	0	0	0	2	0			Rubrobacter	0	0	0	1
Sterolibacterium	0	0	0	0	0	0	2	0			Sterolibacterium	0	0	0	1
Uruburuella	0	0	0	0	0	0	2	0			Uruburuella	0	0	0	1
Dechloromonas	0	0	0	0	0	0	1	10			Dechloromonas	0	0	0	5.5
Brevundimonas	0	0	0	0	0	0	1	5			Brevundimonas	0	0	0	3
Candidatus Methylacidiphilum	0	0	0	0	0	0	1	4			Candidatus Methylacidiphilum	0	0	0	2.5
Haliangium	0	0	0	0	0	0	1	3			Haliangium	0	0	0	2
Moheibacter	0	0	0	0	0	0	1	3			Moheibacter	0	0	0	2
Acidiphilium	0	0	0	0	0	0	1	2			Acidiphilium	0	0	0	1.5
Candidatus Accumulibacter	0	0	0	0	0	0	1	2			Candidatus Accumulibacter	0	0	0	1.5
Vulcanithermus	0	0	0	0	0	0	1	2			Vulcanithermus	0	0	0	1.5
Dechlorobacter	0	0	0	0	0	0	1	1			Dechlorobacter	0	0	0	1
Gemmatimonas	0	0	0	0	0	0	1	1			Gemmatimonas	0	0	0	1
Acidicaldus	0	0	0	0	0	0	1	0			Acidicaldus	0	0	0	0.5
Aquicella	0	0	0	0	0	0	1	0			Aquicella	0	0	0	0.5
Azohydromonas	0	0	0	0	0	0	1	0			Azohydromonas	0	0	0	0.5
Candidatus Roizmanbacteria bacterium GW2011_GWC1_37_12	0	0	0	0	0	0	1	0			Candidatus Roizmanbacteria bacterium GW2011_GWC1_37_12	0	0	0	0.5
Desulfurella	0	0	0	0	0	0	1	0			Desulfurella	0	0	0	0.5
DS-100	0	0	0	0	0	0	1	0			DS-100	0	0	0	0.5
Enterorhabdus	0	0	0	0	0	0	1	0			Enterorhabdus	0	0	0	0.5
Gaiella	0	0	0	0	0	0	1	0			Gaiella	0	0	0	0.5
Gemmatirosa	0	0	0	0	0	0	1	0			Gemmatirosa	0	0	0	0.5
hydrothermal vent metagenome	0	0	0	0	0	0	1	0			hydrothermal vent metagenome	0	0	0	0.5
Legionella	0	0	0	0	0	0	1	0			Legionella	0	0	0	0.5
Lentisphaera	0	0	0	0	0	0	1	0			Lentisphaera	0	0	0	0.5
Methanobrevibacter	0	0	0	0	0	0	1	0			Methanobrevibacter	0	0	0	0.5
Oerskovia	0	0	0	0	0	0	1	0			Oerskovia	0	0	0	0.5
Parcubacteria group bacterium GW2011_GWA1_60_11	0	0	0	0	0	0	1	0			Parcubacteria group bacterium GW2011_GWA1_60_11	0	0	0	0.5
Rubellimicrobium	0	0	0	0	0	0	1	0			Rubellimicrobium	0	0	0	0.5
Sporotomaculum	0	0	0	0	0	0	1	0			Sporotomaculum	0	0	0	0.5
Thermosinus	0	0	0	0	0	0	1	0			Thermosinus	0	0	0	0.5
Thiobacillus	0	0	0	0	0	0	1	0			Thiobacillus	0	0	0	0.5
uncultured compost bacterium	0	0	0	0	0	0	1	0			uncultured compost bacterium	0	0	0	0.5
Azospira	0	0	0	0	0	0	0	8			Azospira	0	0	0	4
Lautropia	0	0	0	0	0	0	0	7			Lautropia	0	0	0	3.5
Microvirga	0	0	0	0	0	0	0	6			Microvirga	0	0	0	3
Achromobacter	0	0	0	0	0	0	0	4			Achromobacter	0	0	0	2
Aliihoeflea	0	0	0	0	0	0	0	4			Aliihoeflea	0	0	0	2
bacterium UW 659-2-F09	0	0	0	0	0	0	0	4			bacterium UW 659-2-F09	0	0	0	2
Candidatus Allobeggiatoa	0	0	0	0	0	0	0	4			Candidatus Allobeggiatoa	0	0	0	2
Effusibacillus	0	0	0	0	0	0	0	4			Effusibacillus	0	0	0	2
Massilia	0	0	0	0	0	0	0	4			Massilia	0	0	0	2
Myxococcus	0	0	0	0	0	0	0	4			Myxococcus	0	0	0	2
SM1A02	0	0	0	0	0	0	0	4			SM1A02	0	0	0	2
Bradyrhizobium	0	0	0	0	0	0	0	3			Bradyrhizobium	0	0	0	1.5
Chthonomonas	0	0	0	0	0	0	0	3			Chthonomonas	0	0	0	1.5
Neochlamydia	0	0	0	0	0	0	0	3			Neochlamydia	0	0	0	1.5
Pir4 lineage	0	0	0	0	0	0	0	3			Pir4 lineage	0	0	0	1.5
Thermaerobacter	0	0	0	0	0	0	0	3			Thermaerobacter	0	0	0	1.5
Arenimonas	0	0	0	0	0	0	0	2			Arenimonas	0	0	0	1
Burkholderia-Paraburkholderia	0	0	0	0	0	0	0	2			Burkholderia-Paraburkholderia	0	0	0	1
Candidatus Amoebophilus	0	0	0	0	0	0	0	2			Candidatus Amoebophilus	0	0	0	1
Desulfovirga	0	0	0	0	0	0	0	2			Desulfovirga	0	0	0	1
Melioribacter	0	0	0	0	0	0	0	2			Melioribacter	0	0	0	1
uncultured Aquificales bacterium	0	0	0	0	0	0	0	2			uncultured Aquificales bacterium	0	0	0	1
uncultured cyanobacterium	0	0	0	0	0	0	0	2			uncultured cyanobacterium	0	0	0	1
Acetitomaculum	0	0	0	0	0	0	0	1			Acetitomaculum	0	0	0	0.5
Acidibacter	0	0	0	0	0	0	0	1			Acidibacter	0	0	0	0.5
Anaeromyxobacter	0	0	0	0	0	0	0	1			Anaeromyxobacter	0	0	0	0.5
Anaerosporomusa	0	0	0	0	0	0	0	1			Anaerosporomusa	0	0	0	0.5
bacterium enrichment culture clone heteroC52_4W	0	0	0	0	0	0	0	1			bacterium enrichment culture clone heteroC52_4W	0	0	0	0.5
Candidatus Aquirestis	0	0	0	0	0	0	0	1			Candidatus Aquirestis	0	0	0	0.5
Candidatus Hodgkinia	0	0	0	0	0	0	0	1			Candidatus Hodgkinia	0	0	0	0.5
Candidatus Tremblaya	0	0	0	0	0	0	0	1			Candidatus Tremblaya	0	0	0	0.5
Candidatus Wolfebacteria bacterium GW2011_GWC1_37_10	0	0	0	0	0	0	0	1			Candidatus Wolfebacteria bacterium GW2011_GWC1_37_10	0	0	0	0.5
Caulobacter	0	0	0	0	0	0	0	1			Caulobacter	0	0	0	0.5
Clostridium sensu stricto 13	0	0	0	0	0	0	0	1			Clostridium sensu stricto 13	0	0	0	0.5
Erysipelotrichaceae UCG-004	0	0	0	0	0	0	0	1			Erysipelotrichaceae UCG-004	0	0	0	0.5
Ferrovibrio	0	0	0	0	0	0	0	1			Ferrovibrio	0	0	0	0.5
Fusobacterium	0	0	0	0	0	0	0	1			Fusobacterium	0	0	0	0.5
Geothermobacter	0	0	0	0	0	0	0	1			Geothermobacter	0	0	0	0.5
Isosphaera	0	0	0	0	0	0	0	1			Isosphaera	0	0	0	0.5
Lachnospiraceae XPB1014 group	0	0	0	0	0	0	0	1			Lachnospiraceae XPB1014 group	0	0	0	0.5
Loktanella	0	0	0	0	0	0	0	1			Loktanella	0	0	0	0.5
Lutibacter	0	0	0	0	0	0	0	1			Lutibacter	0	0	0	0.5
Marinobacter	0	0	0	0	0	0	0	1			Marinobacter	0	0	0	0.5
Noviherbaspirillum	0	0	0	0	0	0	0	1			Noviherbaspirillum	0	0	0	0.5
Parabacteroides	0	0	0	0	0	0	0	1			Parabacteroides	0	0	0	0.5
Pir2 lineage	0	0	0	0	0	0	0	1			Pir2 lineage	0	0	0	0.5
Prevotellaceae UCG-001	0	0	0	0	0	0	0	1			Prevotellaceae UCG-001	0	0	0	0.5
Prevotellaceae UCG-004	0	0	0	0	0	0	0	1			Prevotellaceae UCG-004	0	0	0	0.5
Quadrisphaera	0	0	0	0	0	0	0	1			Quadrisphaera	0	0	0	0.5
Ramlibacter	0	0	0	0	0	0	0	1			Ramlibacter	0	0	0	0.5
Roseburia	0	0	0	0	0	0	0	1			Roseburia	0	0	0	0.5
Roseivivax	0	0	0	0	0	0	0	1			Roseivivax	0	0	0	0.5
Soehngenia	0	0	0	0	0	0	0	1			Soehngenia	0	0	0	0.5
Sorangium	0	0	0	0	0	0	0	1			Sorangium	0	0	0	0.5
Spirillum	0	0	0	0	0	0	0	1			Spirillum	0	0	0	0.5
Sporomusa	0	0	0	0	0	0	0	1			Sporomusa	0	0	0	0.5
Stenotrophomonas	0	0	0	0	0	0	0	1			Stenotrophomonas	0	0	0	0.5
Syntrophobacter	0	0	0	0	0	0	0	1			Syntrophobacter	0	0	0	0.5
Tepidisphaera	0	0	0	0	0	0	0	1			Tepidisphaera	0	0	0	0.5
Thermotalea	0	0	0	0	0	0	0	1			Thermotalea	0	0	0	0.5
uncultured beta proteobacterium	0	0	0	0	0	0	0	1			uncultured beta proteobacterium	0	0	0	0.5
uncultured candidate division BRC1 bacterium	0	0	0	0	0	0	0	1			uncultured candidate division BRC1 bacterium	0	0	0	0.5
uncultured eubacterium WD264	0	0	0	0	0	0	0	1			uncultured eubacterium WD264	0	0	0	0.5
